# Supplementary material
Source: PubMed Central journal article supplement (PMC4865268)
Supplement: NIHMS773795-supplement-Supp_Info.pdf [file NIHMS773795-supplement-Supp_Info.pdf]

Supplement online.

a.

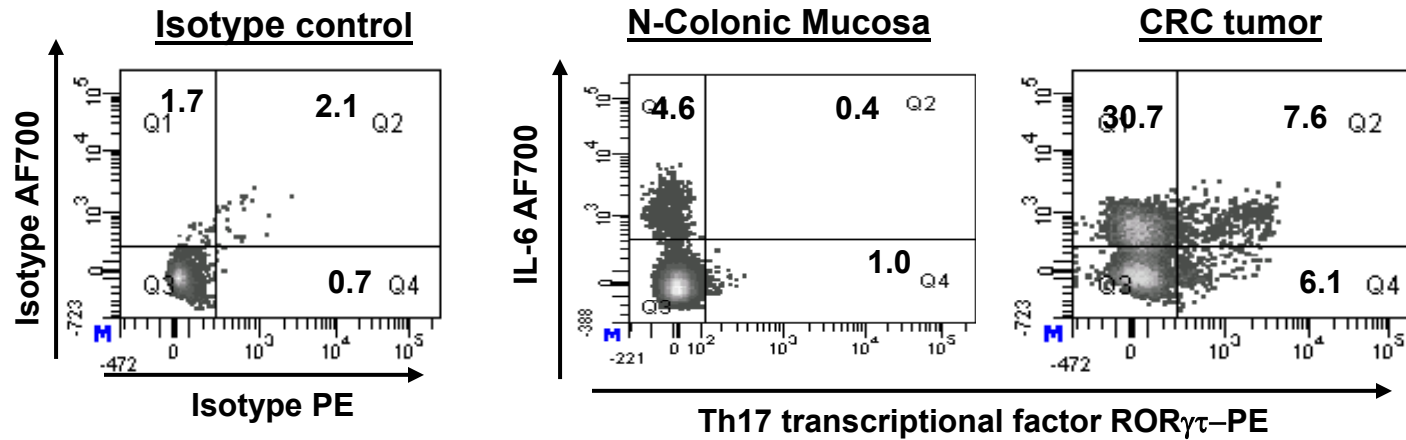

b.

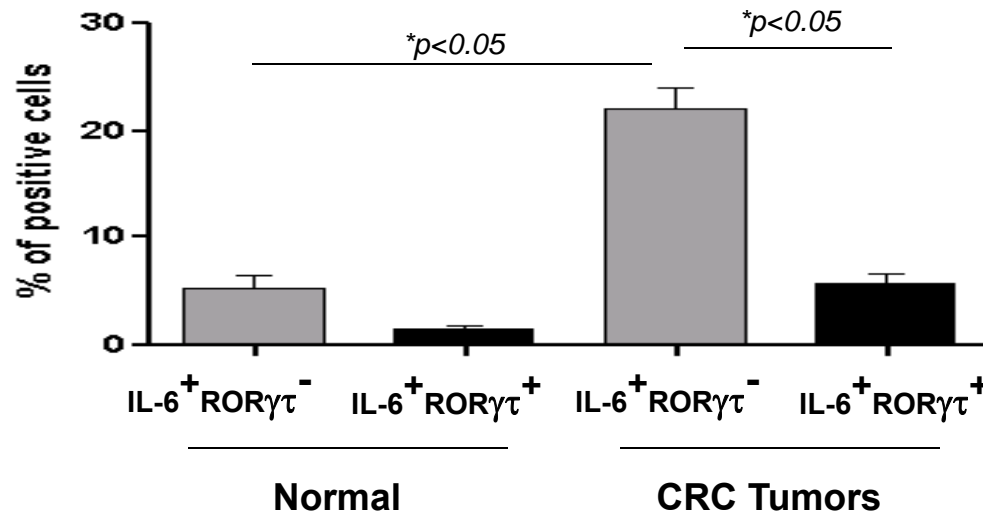

Figure S1. IL-6 production is strongly increased in CRC tumor stroma by cells that do not express Th17 transcriptional RORγτ. (a) Freshly digested normal colonic mucosal and CRC tumor cell preparations were prepared, stimulated for 4 h with PMA/Iono and co-stained with anti-RORγτ and IL-6 mAbs or isotype controls and analyzed by flow cytometry. (a) One representative experiment and (b) the summary of the collective results of 6 separate experiments are shown, n=6, \* = p < 0.05.

Supplement online.

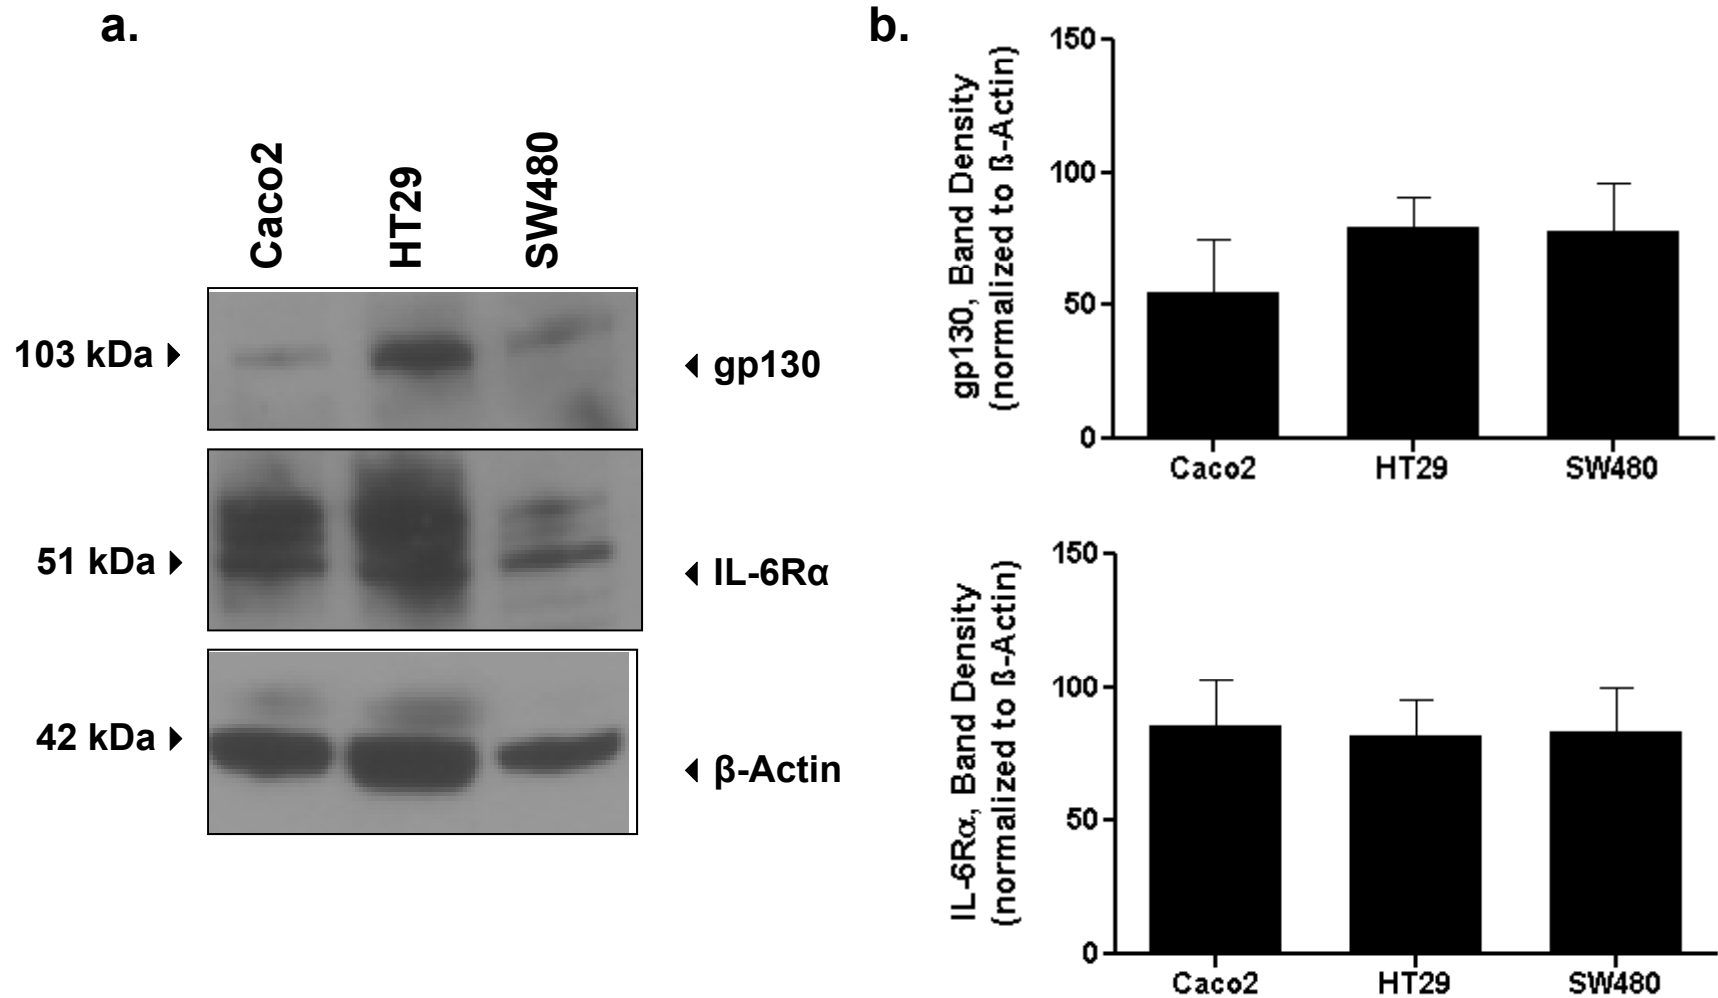

Figure S2. IL-6 receptor complex gp130 and IL-6R $\alpha$  are expressed by CRC cell lines SW480, Caco-2 and HT-29. (a) A representative Western blot under denaturing conditions demonstrating expression of gp130, IL-6R $\alpha$ .  $\beta$ -Actin was used for the loading control. (b) Image J software was used to calculate relative Band Density. Adjusted density values for tested samples were calculated by dividing the Relative Density of each Sample lane obtained for protein of interest by the Relative Density of the loading-control for the same lane (stain with anti- $\beta$ -actin Abs), n=3, \*, \*\* = p < 0.05.

Supplement online.

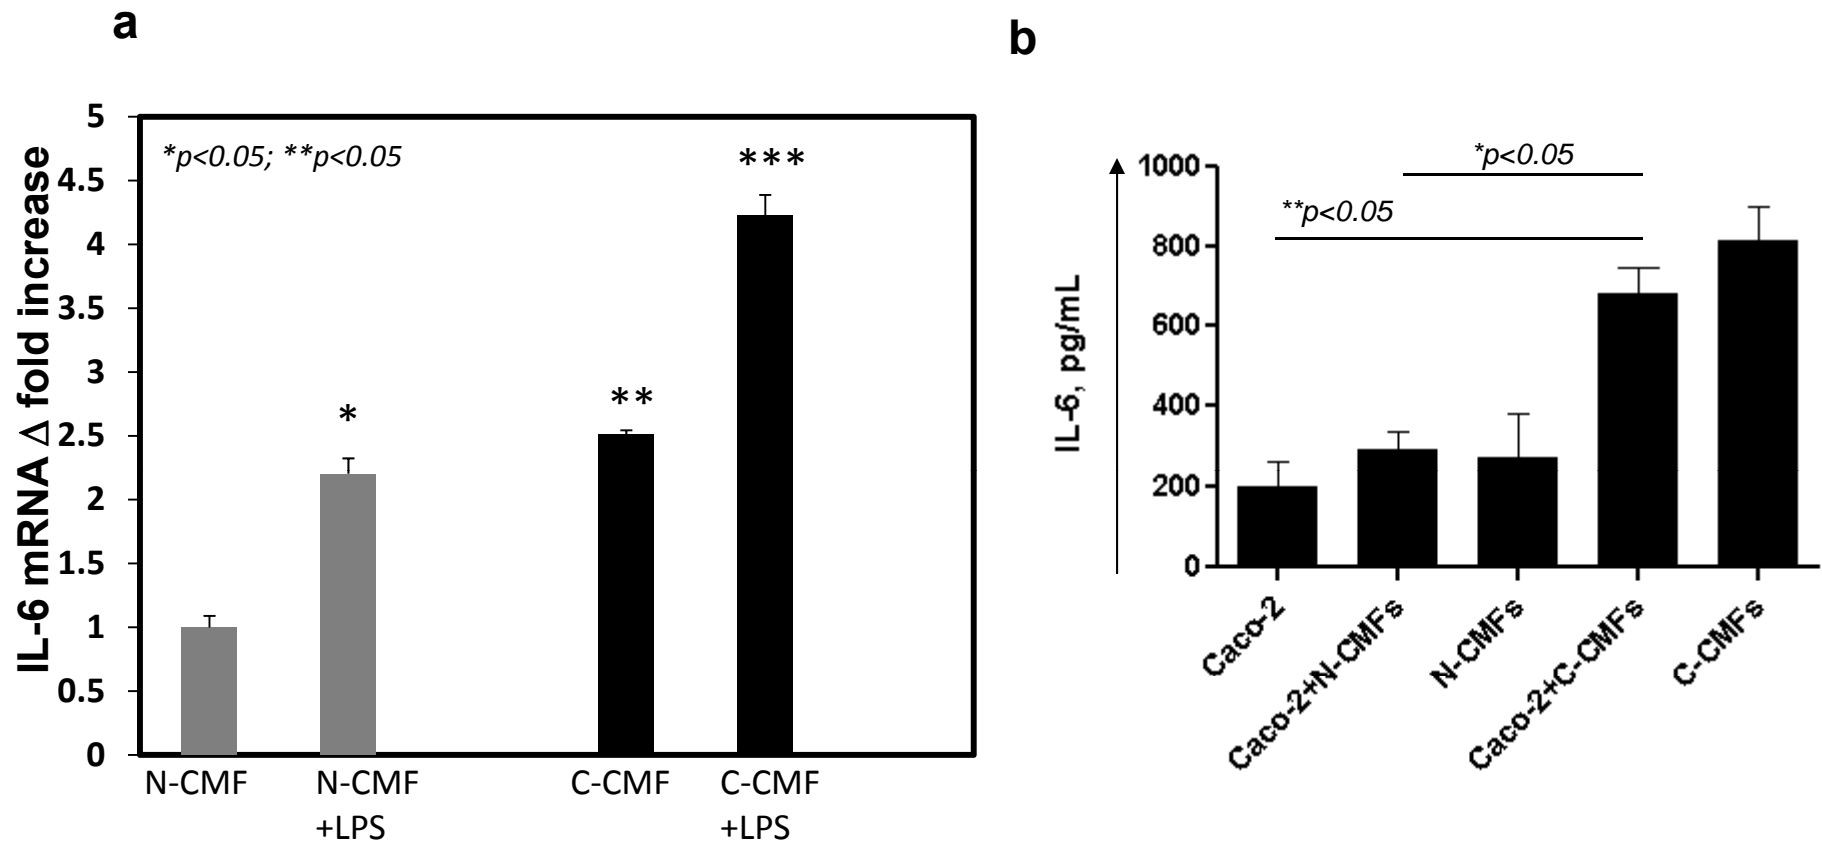

Figure S3. **(a)** IL-6 mRNA expression is increased by CMFs in response to the LPS treatment (1  $\mu$ g/mL, 24 h) as determined by real-time RT-PCR, n=10, \* =  $p < 0.05$ . **(b)** Production of IL-6 is higher in Caco-2 : C-CMFs co-cultures, but comparable with the C-CMFs monocultures. Single-plex cytokine analysis. The means  $\pm$  SE are shown as the results of duplicates of four tested CMF pairs co-cultured with Caco-2, n=4\* =  $p < 0.05$ .
